# Supplementary material
Source: publisher site journal article supplement (https://www.spandidos-publications.com/6427/downloadSupplementary)

Figure S1. Receiver operating characteristic curves of noninfectious complications for perioperative factors to determine the cutoff values and AUC. (A) Age, (B) sex, (C) PS, (D) mFI, (E) CCI, (F) use of steroids, (G) preoperative CRP levels, (H) PNI, (I) NLR, (J) PLR, (K) BMI, (L) VFA, (M) SMI, (N) PreT, (O) PreN, (P) extent of resection, (Q) surgical approach, (R) extent of LN dissection, (S) node dissection according to guidelines, (T) Op duration, (U) blood loss and (V) fStage. AUC, area under the receiver operating characteristic curve; BMI, body mass index; CCI, Charlson comorbidity index; CRP, C-reactive protein; fStage, final stage; LN dissection, lymph node dissection; mFI, modified frailty index; NLR, neutrophil-to-lymphocyte ratio; Op duration, operative duration; PLR, platelet-to-lymphocyte ratio; PNI, prognostic nutritional index; PreN, preoperative N factor; PreT, preoperative T factor; PS, performance status; SMI, skeletal muscle index; VFA, visceral fat area.

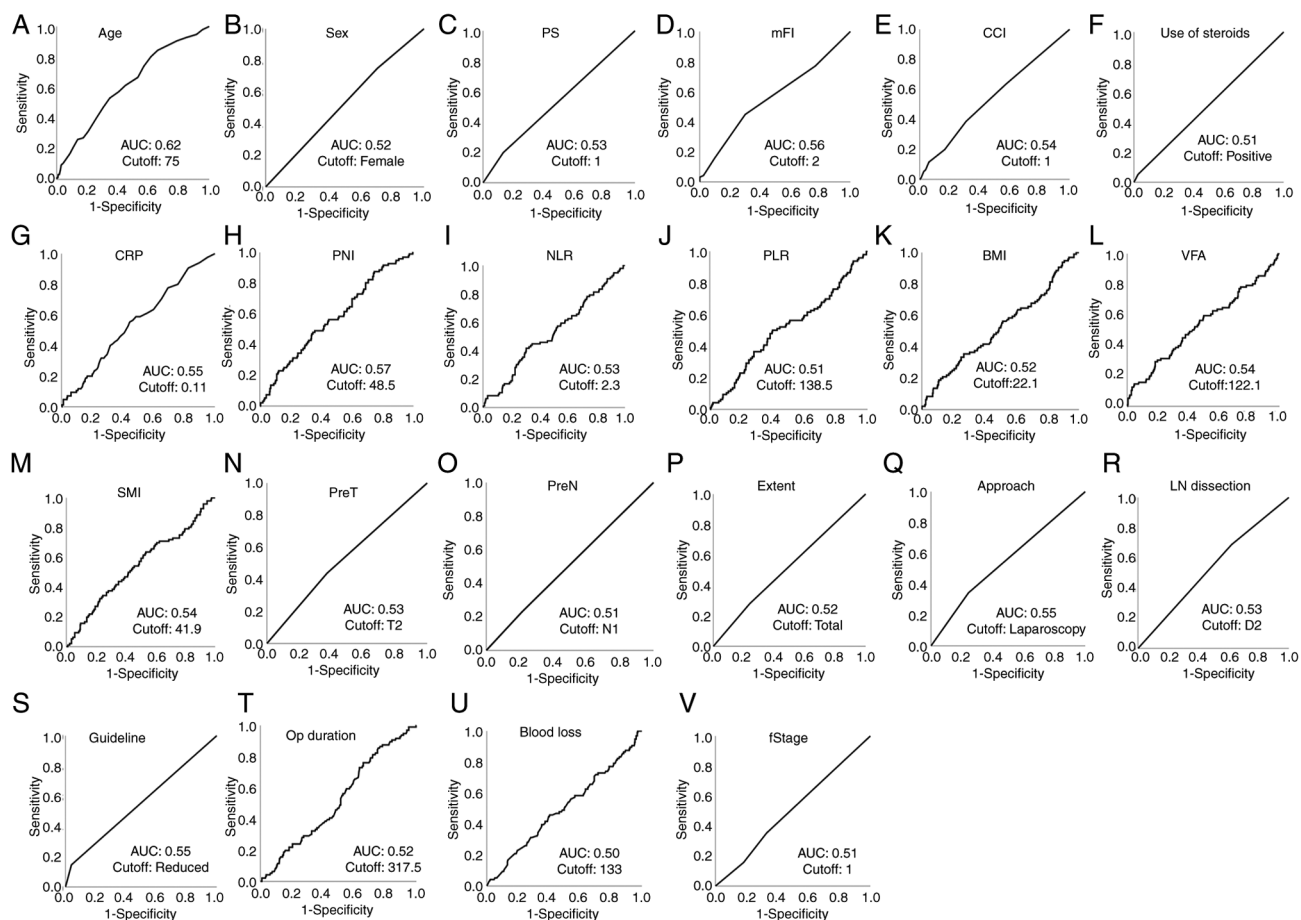

Supplement: Supplementary file 1 [file downloadSupplementary]
